# Supplementary material for: CKI isoforms α and ε regulate Star–PAP target messages by controlling Star–PAP poly(A) polymerase activity and phosphoinositide stimulation
Source: PubMed Central journal article supplement — Nucleic Acids Res. 2011 Jul 4;39(18):7961–73. doi: 10.1093/nar/gkr549 (PMC3185439; doi:10.1093/nar/gkr549), 2011-07-04

## Title

CKI isoforms  $\alpha$  and  $\epsilon$  regulate Star-PAP target messages by controlling Star-PAP poly (A)  
polymerase activity and phosphoinositide stimulation

Rakesh S. Laishram<sup>1</sup>, Christy A. Barlow<sup>2</sup>, and Richard A. Anderson<sup>1\*</sup>

<sup>1</sup> *University of Wisconsin-Madison, Department of Pharmacology, 1300 University Ave.  
University of Wisconsin Medical School, Madison, Wisconsin, 53706*

<sup>2</sup> *Present address: ChemRisk, LLC, 4840 Pearl East Circle, Suite 300 West, Boulder, CO 80301*

\* Corresponding Author

Richard A. Anderson

Department of Pharmacology

1300 University of Wisconsin-Madison

Madison, WI 53706

Phone: 608-262-3573

Fax: 608-262-1257

E-mail: raanders@wisc.edu

**Supplementary Figure 1.** (A) Quantification of the kinase activity toward Flag-Star-PAP in the presence of increasing amounts of PI4,5P<sub>2</sub> from the autoradiogram in Fig. 1C. The intensity in arbitrary unit is expressed relative to the amount of total protein in each lane. (B) Immunoprecipitation of Star-PAP from the HEK-293 cells in presence of tBHQ stimulation and immunoblotted for Star-PAP and CKI $\alpha$ . Control cells were treated with DMSO.

**Supplementary Figure 2:** (A) *In vitro* kinase assay of Flag Star-PAP complex purified from HEK 293 cells stably expressing Flag-tagged Star-PAP after treatment with tBHQ (100  $\mu$ M for 4 h) or the solvent control DMSO with no exogenous substrate as in Fig. 1D, but with 5, 10 or 15  $\mu$ M CKI7 and IC261 treatment prior to initiation of the kinase reaction. (B) Quantification of the kinase activity toward Star-PAP from the autoradiogram in A. The intensity in arbitrary unit normalized for the total protein in each lane is expressed relative to the control untreated sample.

**Supplementary Figure 3:** (A) Western analysis of siRNA knockdown of CKI $\alpha$  and control actin. (B) The Flag Star-PAP complex was affinity purified from cell lysates by Flag affinity chromatography of Flag Star-PAP wild-type or a mutant with a deletion of the proline rich region (residues 223 to 275). Prior to purification, cells were treated with CKI $\alpha$  inhibitors, tBHQ, or DMSO as indicated and then analyzed by Western blot for Star-PAP. Sup=supernatant, F/T=Flow through, E1-E3=elution fractions of the Star-PAP complex, St=Strip of the column.

**Supplementary Figure 4:** (A) Western blot analysis of Star-PAP and other associated members of the Star-PAP polyadenylation complex (RNAPII, CPSF 73, PIPKI $\alpha$ , CKI $\alpha$ ) as indicated (left panel) after HEK-293 cells were immunoprecipitated (IP) with a rabbit polyclonal antibody specific for Star-PAP or with normal rabbit IgG after treatment with IC261 (100  $\mu$ M for 2.5 h), tBHQ (100  $\mu$ M for 4 h), and DMSO as indicated in the top panel.  $\beta$ -tubulin was used as a

loading control. (B) *In vitro* kinase assay of CKIε with its generic kinase substrate casein. The <sup>32</sup>P incorporated and the total protein (coomassie-stained) are indicated.

**A**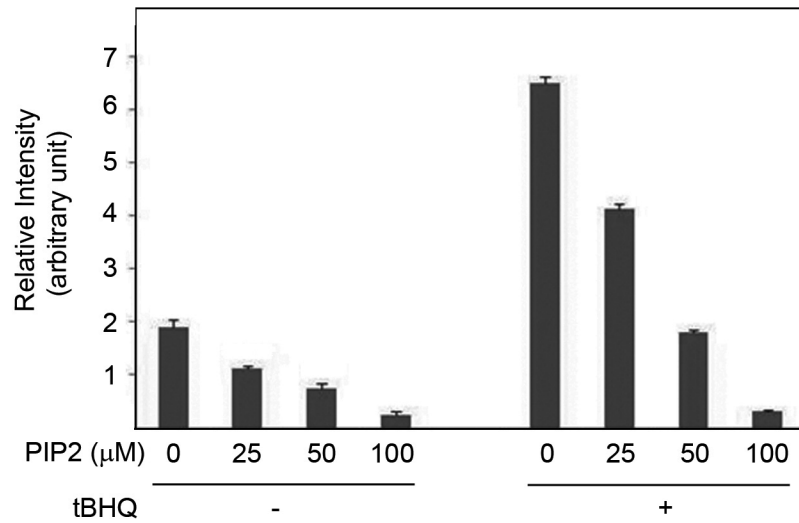**B**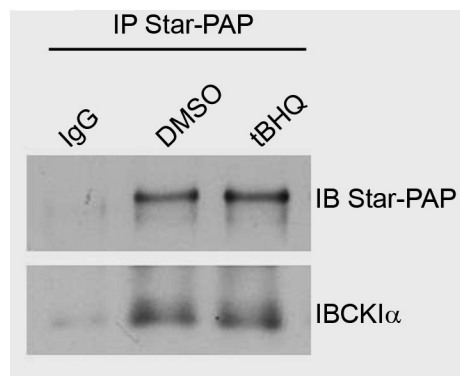

**A**

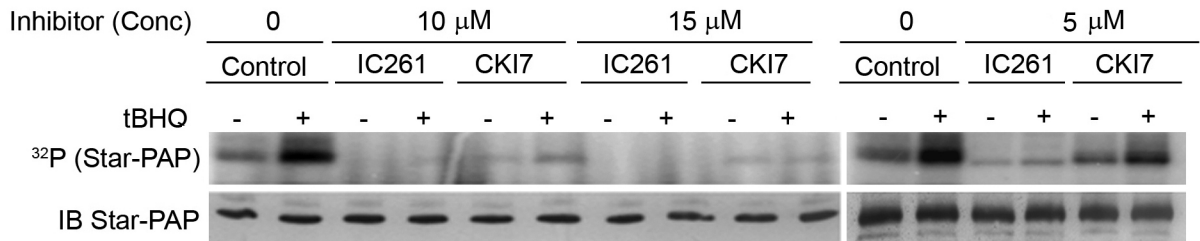

**B**

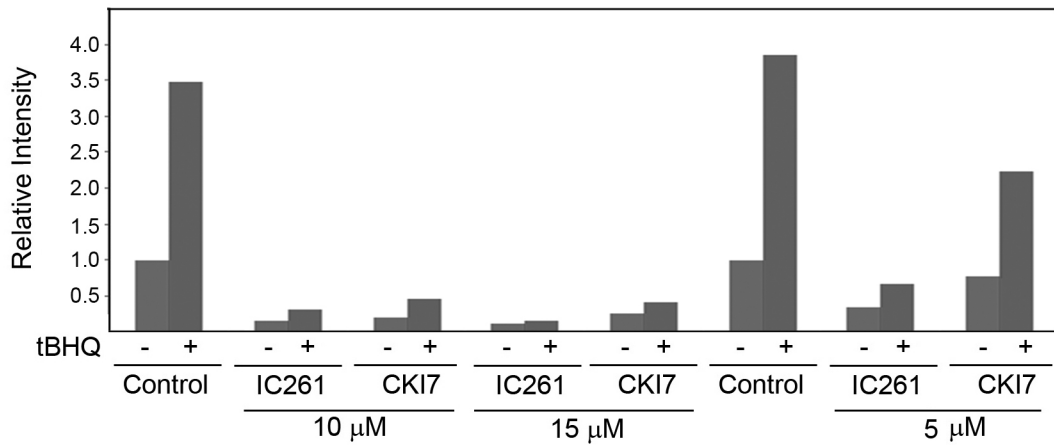

A

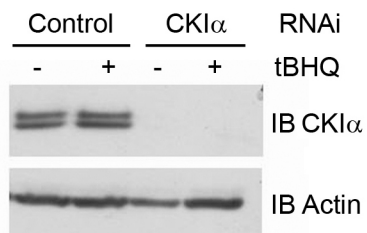

B

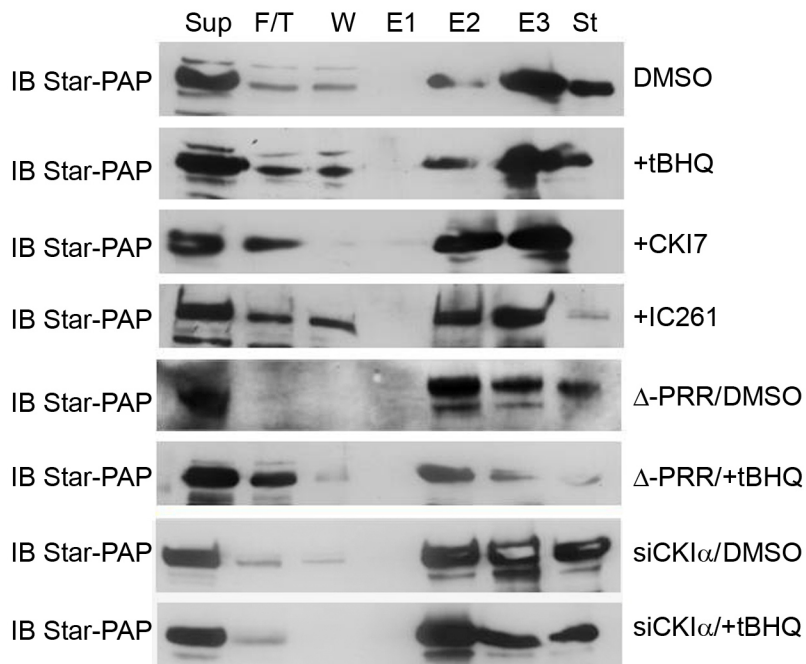

A

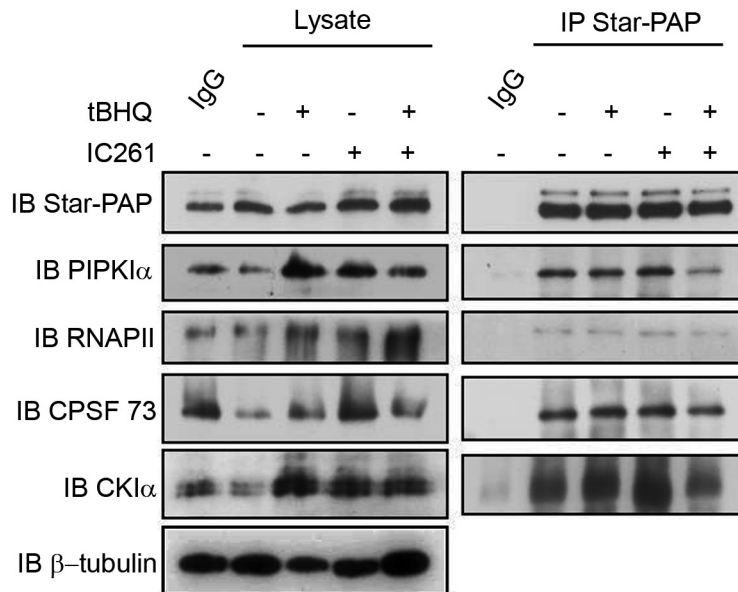

B

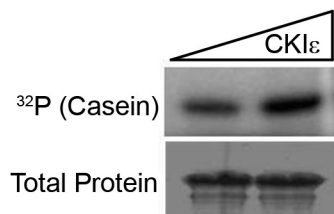

Supplement: supp_gkr549_Supplementary_Data.pdf [file supp_gkr549_Supplementary_Data.pdf]
